# Supplementary material for: Colorimetric and ON–OFF–ON fluorescent chemosensor for the sequential detection of Cu(ii) and cysteine and its application in imaging of living cells
Source: Royal Society of Chemistry journal article supplement (doi:10.1039/c6ra15458a), 2016-01-01
Supplement: c6ra15458a1.pdf [file c6ra15458a1.pdf]

*Supplementary Content*

**Colorimetric and ON-OFF-ON fluorescent chemosensor for the sequential detection of Cu(II) and Cysteine and its application in imaging of living cells**

Yadvendra Singh, Shiva Arun, Brijesh Kumar Singh, Pradip Kumar Dutta\* and Tamal Ghosh\*

Department of Chemistry, Motilal Nehru National Institute of Technology, Allahabad, Pin-211004, India.

Equation for calculation of binding constant for 1:1 stoichiometry using UV-Visible spectral data

$$\frac{\Delta A}{b} = \frac{Q_t K_a \Delta \varepsilon [L]}{1 + K[L]} \quad (\text{eq 1})$$

where,  $\Delta A$  refers to the change in absorbance from initial value at the required wavelength,  $b$  is cuvette path length (in cm),  $Q_t$  is total concentration of sensor,  $K_a$  is the apparent binding constant,  $\Delta \varepsilon$  is the change in extinction coefficient between free and bound sensor and  $[L]$  is the concentration of  $\text{Cu}^{2+}$  ion or Cysteine.

Equation for calculation of binding constant for 1:1 stoichiometry using Fluorescence spectral data

$$\frac{I_0}{I} = 1 + K[L] \quad (\text{eq 2})$$

where,  $I_0$  is the fluorescence intensity of the sensor **1** in the absence of  $\text{Cu}^{2+}$  ion,  $I$  is fluorescence intensity due to **1**-Cu(II) upon addition of  $\text{Cu}^{2+}$  ion,  $K$  is the equilibrium constant and  $[L]$  is the concentration of  $\text{Cu}^{2+}$  ion.

$$\frac{I}{I_0} = \frac{1 + \left(\frac{k_f}{k_s}\right)K[L]}{1 + K[L]} \quad (\text{eq 3})$$

where,  $I_0$  is the fluorescence intensity of the **1**-Cu(II) in the absence of Cysteine,  $I$  is fluorescence intensity due to free **1** upon addition of Cysteine,  $k_f$  is proportionality constant of the free sensor **1**,  $k_s$  is proportionality constant of the **1**-Cu(II),  $K$  is the equilibrium constant and  $[L]$  is the concentration of Cysteine.

Calculation method for detection limit:

To determine the detection limit, UV-Visible titration of **1** with  $\text{Cu}^{2+}$  is carried out by adding aliquots of micromolar concentration of  $\text{Cu}^{2+}$ . The lowest concentration of  $\text{Cu}^{2+}$  that caused a sharp change in the absorbance is recorded as experimental and real detection limit.

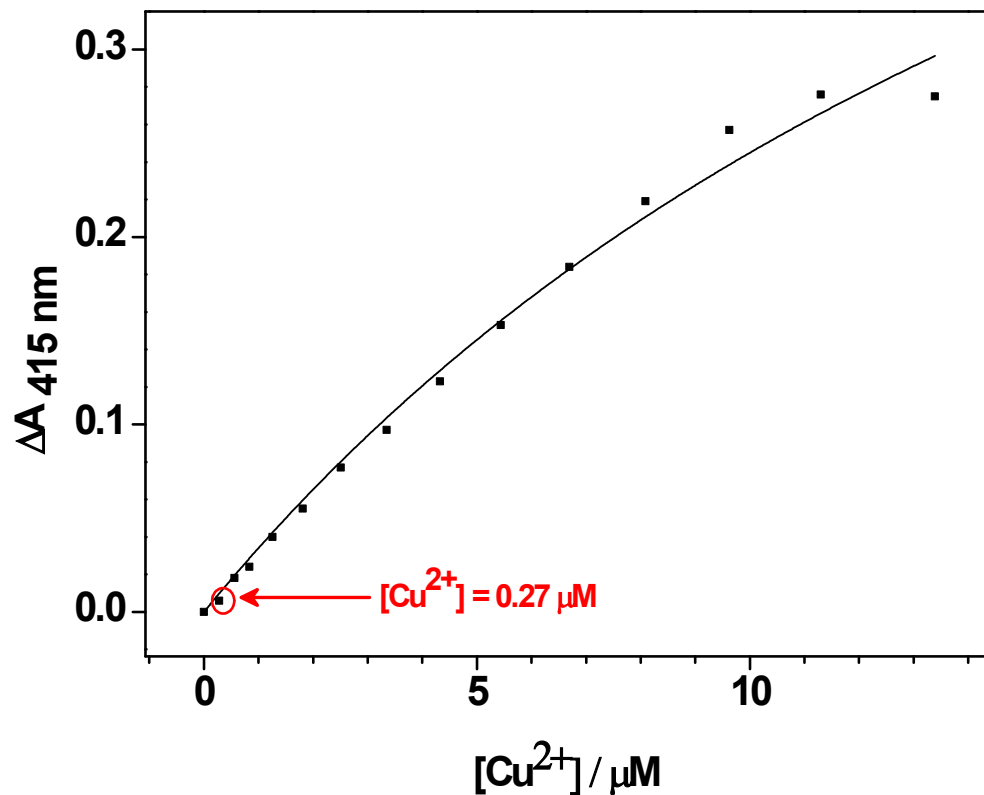

**Inset of Fig. 1.** Scatter plot of the experimental data (change in absorbance for **1** at 415 nm ( $\Delta A_{415 \text{ nm}}$ ) vs.  $[\text{Cu}^{2+}]$ ), obtained from the UV-Visible spectral change for **1** upon addition of  $\text{Cu}^{2+}$  in DMSO/ $\text{H}_2\text{O}$  (3:7 v/v) at 298 K.  $[\mathbf{1}] = 1.3 \times 10^{-5} \text{ M}$ ,  $[\text{Cu}^{2+}] = (0 - 1.33) \times 10^{-5} \text{ M}$ .

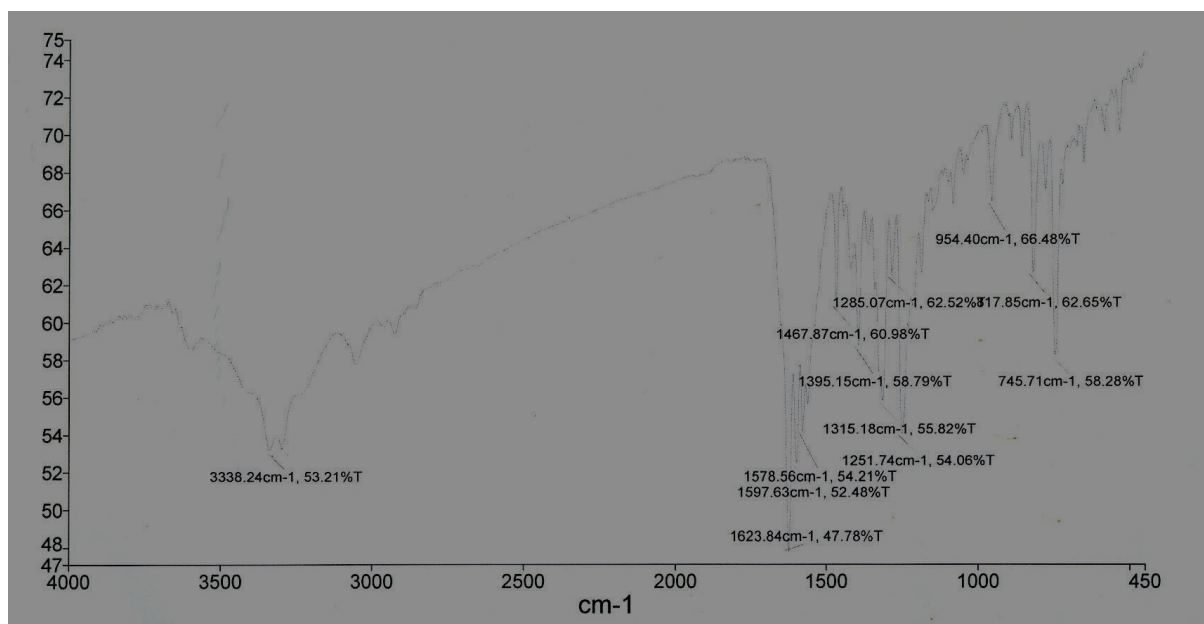

**Fig. S1.** FTIR Spectrum of **1**.

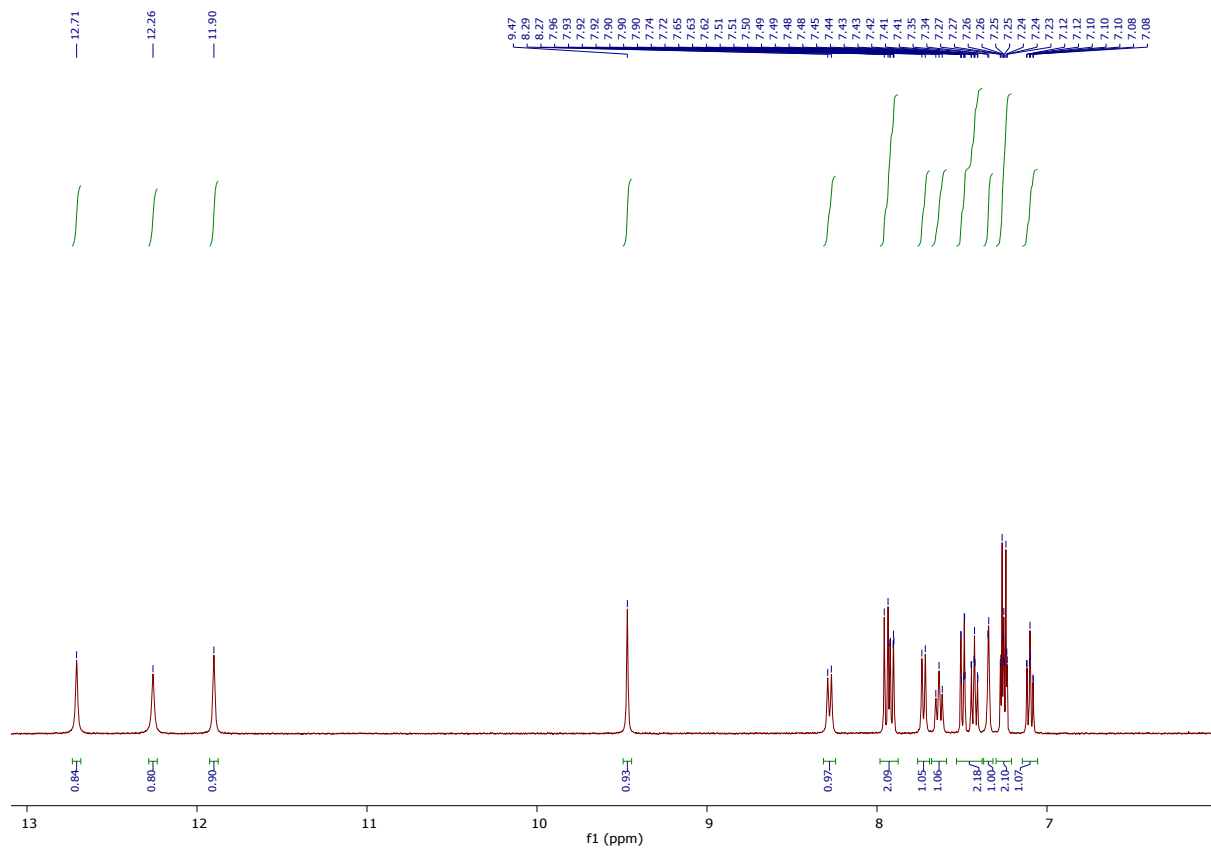

**Fig. S2.**  $^1\text{H}$  NMR of **1** (400 MHz,  $\text{DMSO-}d_6$ ).

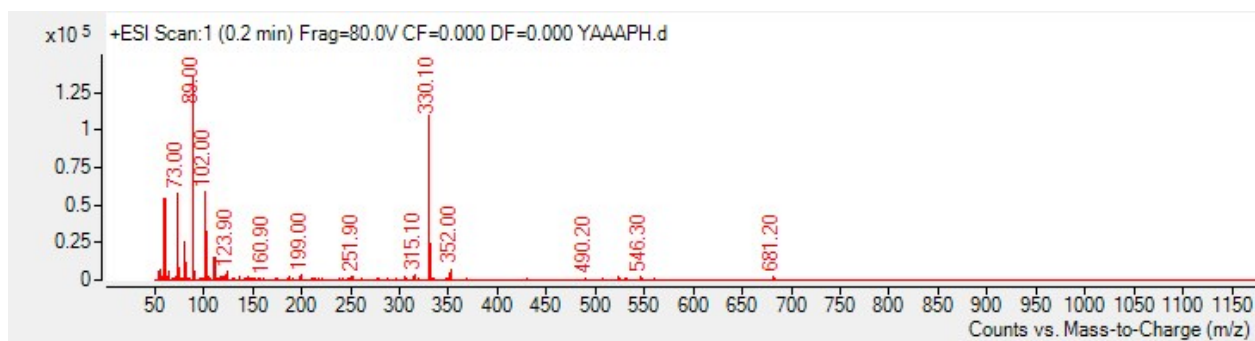

**Fig. S3.** ESI-MS of **1**.

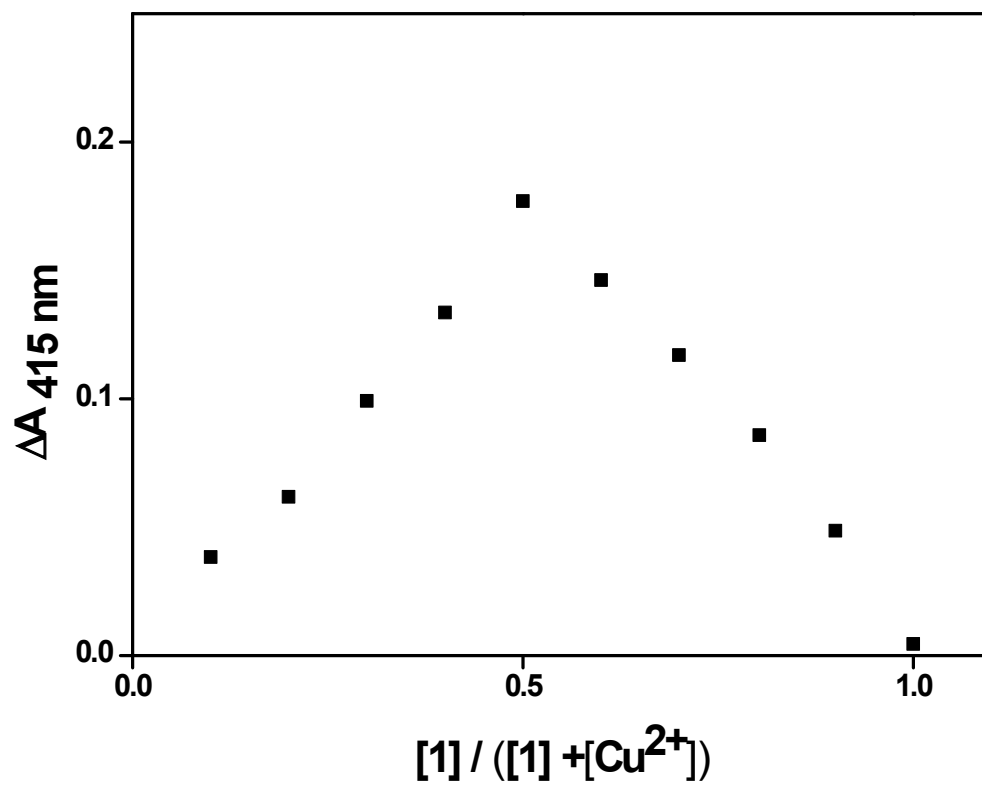

**Fig. S4.** The stoichiometric analysis of **1** with  $\text{Cu}^{2+}$  by Job's plot;  $([\mathbf{1}] + [\text{Cu}^{2+}]) = 2 \times 10^{-5}$  M in DMSO/ $\text{H}_2\text{O}$  (3:7 v/v).

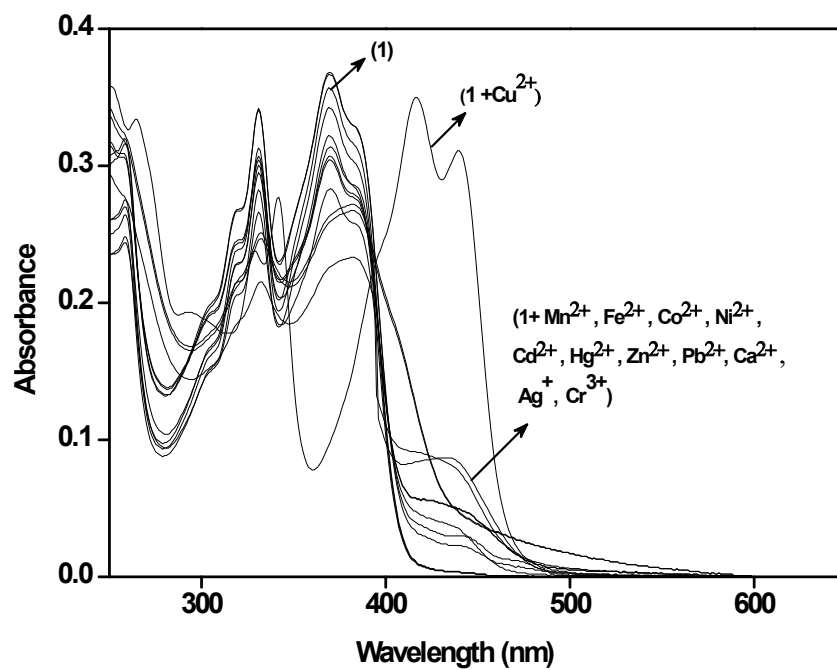

**Fig. S5.** UV-Visible spectrum of **1** ( $1.9 \times 10^{-5}$  M) upon addition of different cations (2 equivalents) in DMSO/H<sub>2</sub>O (3:7 v/v).



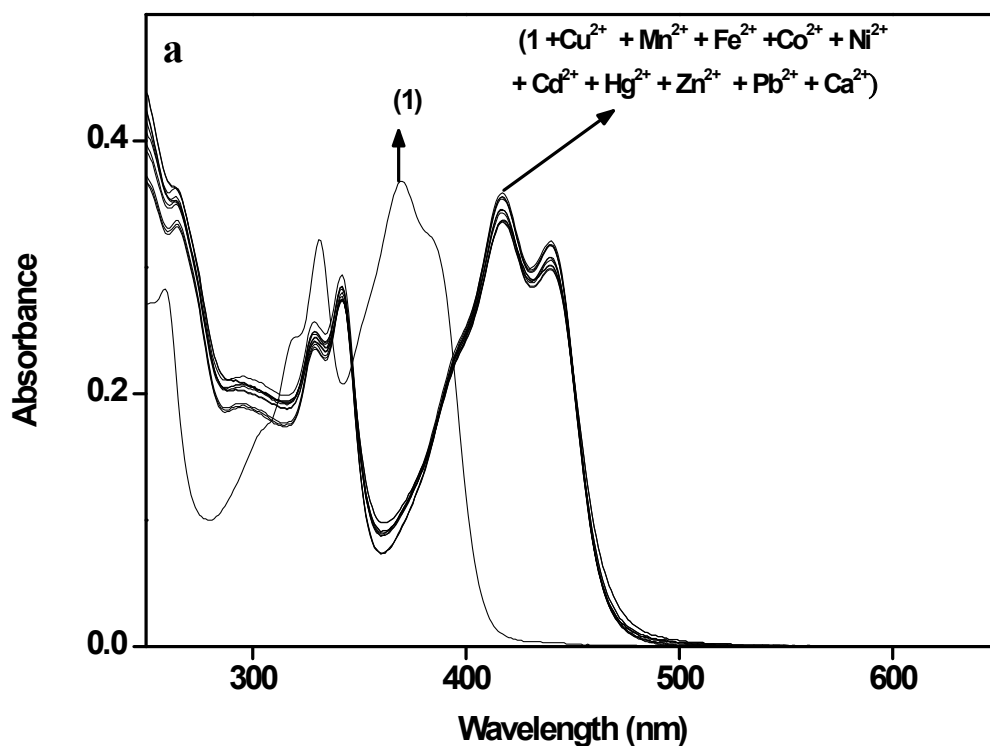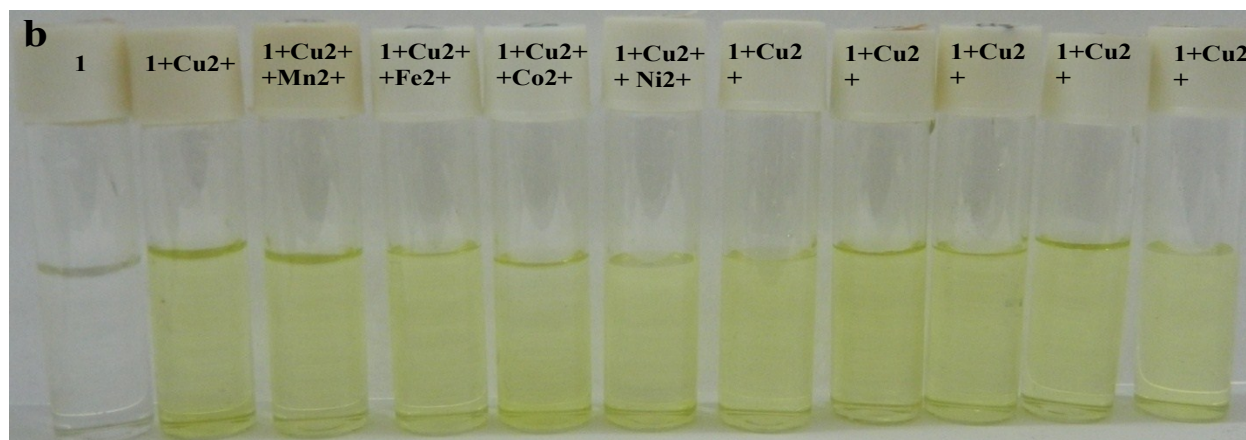

**Fig. S6.** (a) Absorption spectral changes observed for **1** ( $1.9 \times 10^{-5}$  M) with Cu<sup>2+</sup> (2 equivalents) in the presence of 2 equivalents of other cations in DMSO/H<sub>2</sub>O (3:7 v/v). (b) Color changes observed for **1** ( $1.9 \times 10^{-5}$  M) with Cu<sup>2+</sup> (2 equivalents) in the presence of 2 equivalents of other cations in DMSO/H<sub>2</sub>O (3:7 v/v).

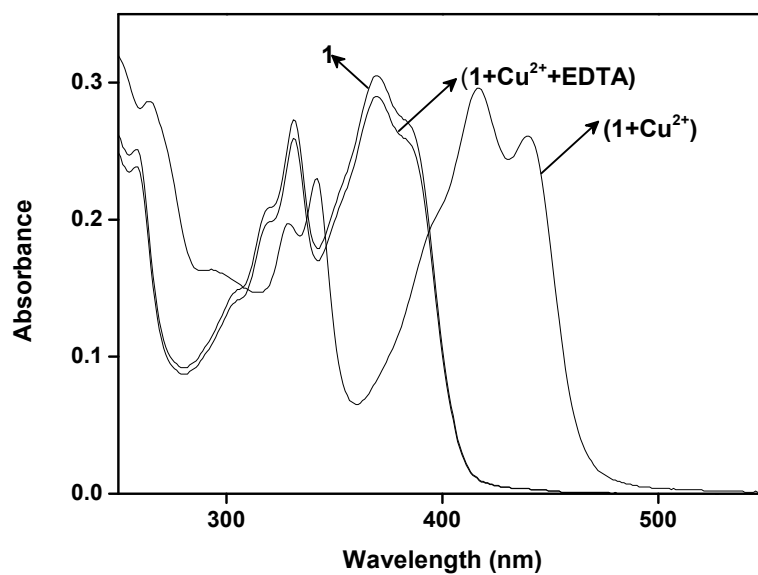

**Fig. S7.** UV-Visible spectral changes observed for **1** ( $1.3 \times 10^{-5}$  M) with  $\text{Cu}^{2+}$  (2 equivalents) in the presence of 2 equivalents of EDTA in DMSO/ $\text{H}_2\text{O}$  (3:7 v/v).

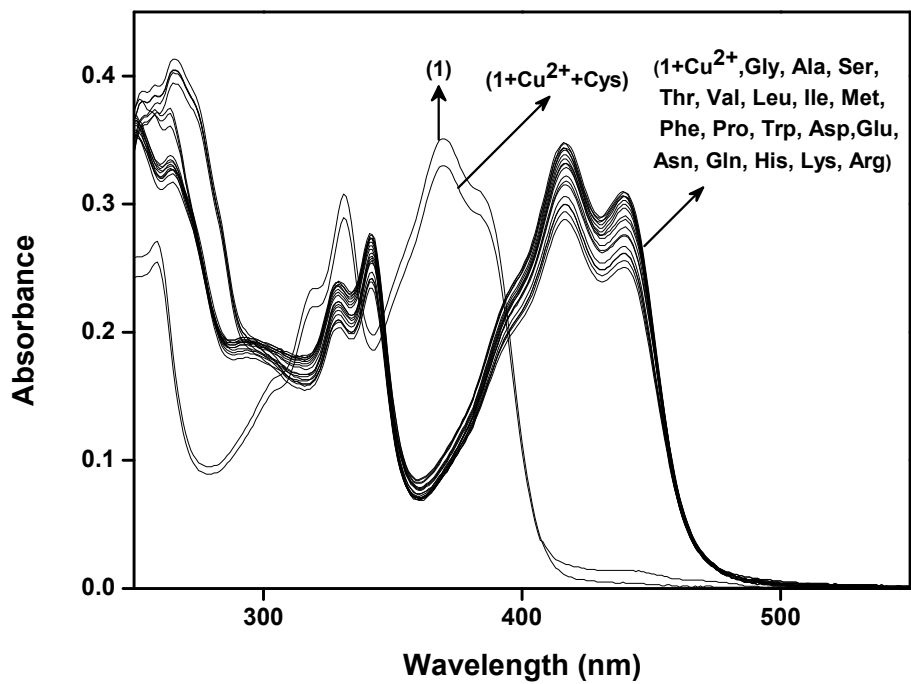

**Fig. S8.** Absorption spectral changes of **1**-Cu(II) upon addition of 30 equivalents of different amino acids in DMSO/H<sub>2</sub>O (3:7 v/v) solution. [**1**-Cu(II)] =  $6.2 \times 10^{-6}$  M.

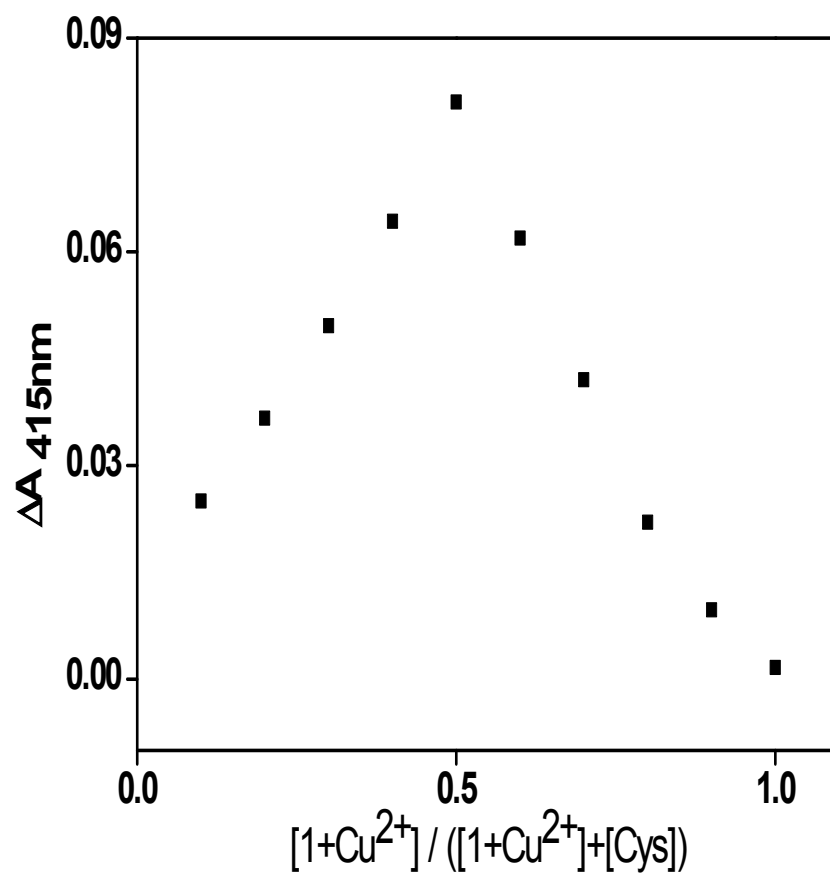

**Fig. S9.** The stoichiometric analysis of **1**-Cu(II) with Cys by Job's plot; ( $[1-Cu(II)] + [Cys] = 2 \times 10^{-5}$  M in DMSO/H<sub>2</sub>O (3:7 v/v)).

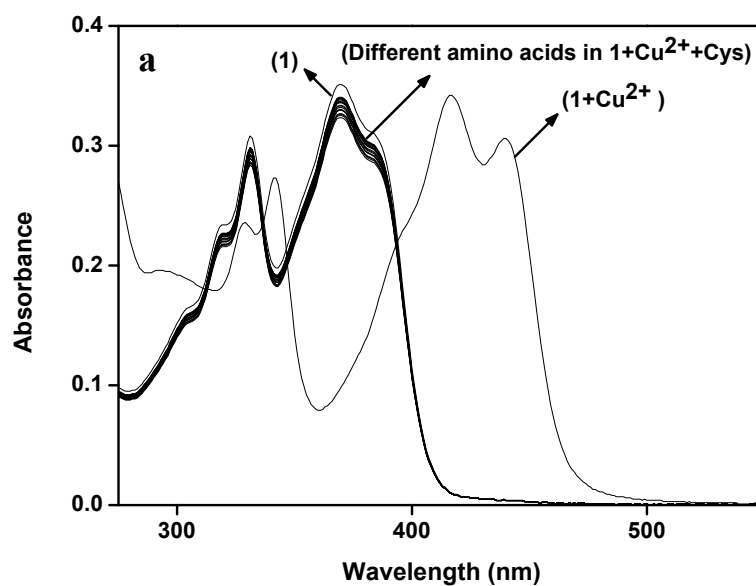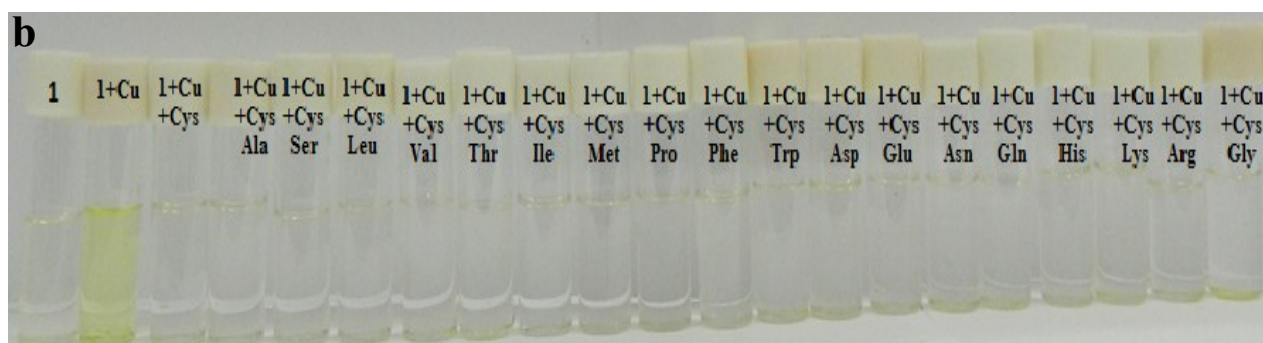

**Fig. S10.** (a) Absorption spectral changes of competitive selectivity of **1**-Cu(II),  $[1\text{-Cu(II)}] = 6.2 \times 10^{-6} \text{ M}$ , towards Cys (30 equivalents) in the presence of other amino acids (30 equivalents) in DMSO/H<sub>2</sub>O (3:7 v/v) solution. (b) Colour changes of competitive selectivity of **1**-Cu(II),  $[1\text{-Cu(II)}] = 6.2 \times 10^{-6} \text{ M}$ , towards Cys (30 equivalents) in the presence of other amino acids (30 equivalents) in DMSO/H<sub>2</sub>O (3:7 v/v) solution.
